# Supplementary material for: Zooplankton as Mercury Repository in Lake Maggiore (Northern Italy): Biomass Composition and Stable Isotope Analysis
Source: MDPI journal article supplement (doi:10.3390/w14050680), 2022-02-22
Supplement: s1 [file s1]

Archive with 1 entries (1 files):
- water-1594069-supplementary.pdf
