# Supplementary material for: Zooplankton as Mercury Repository in Lake Maggiore (Northern Italy): Biomass Composition and Stable Isotope Analysis
Source: MDPI journal article supplement (doi:10.3390/w14050680), 2022-02-22
Supplement: s1 [file s1 › water-1594069-supplementary.pdf]

# Supplementary Material

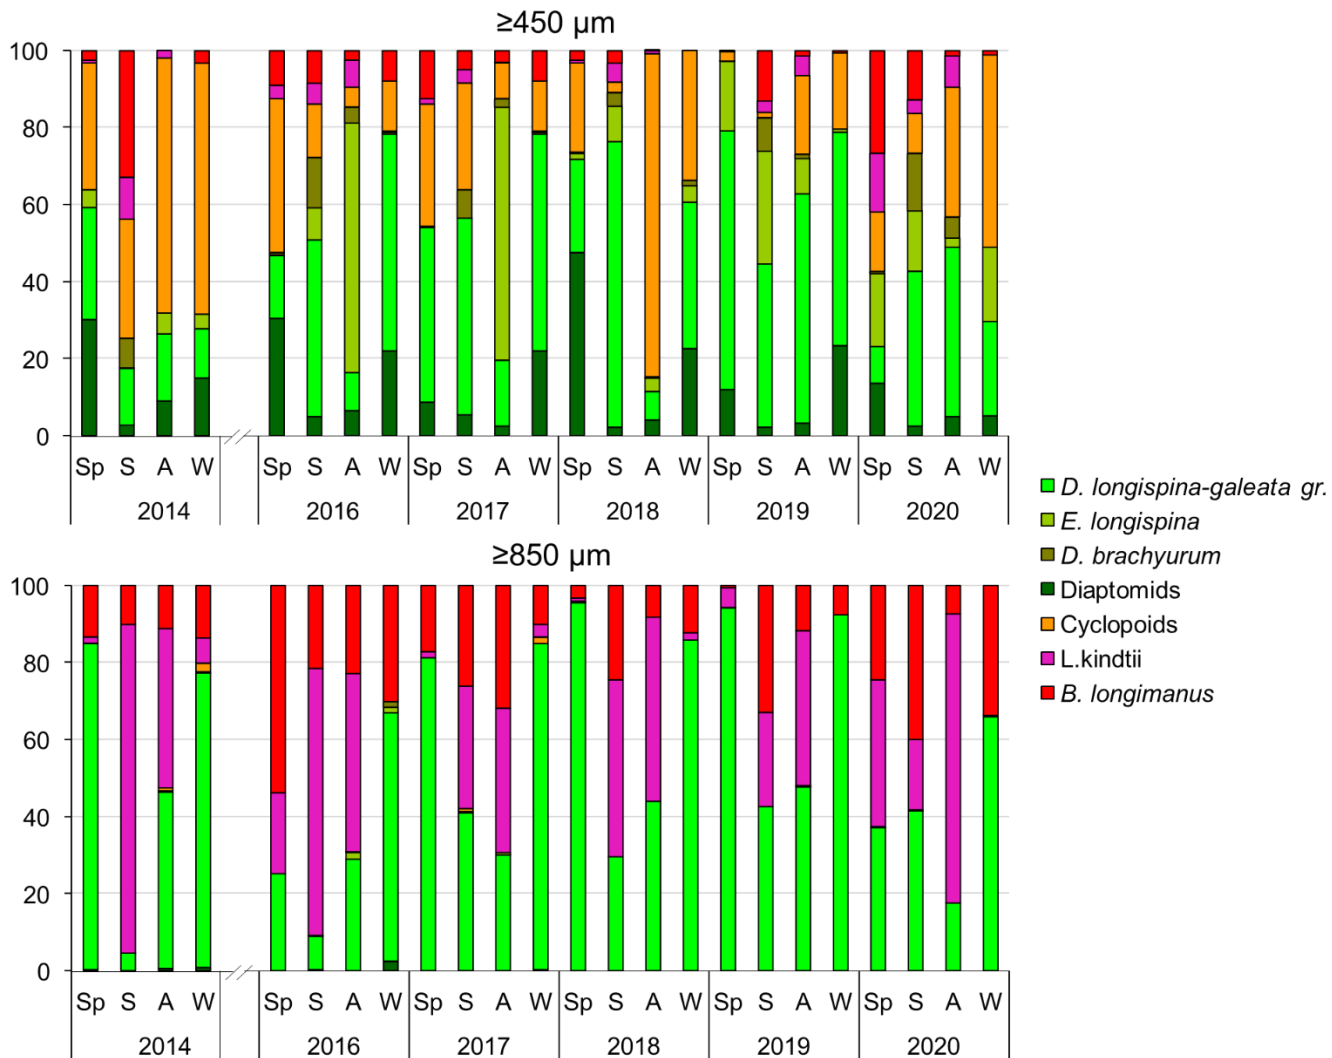

**Figure S1.** Relative contribution (%) of zooplankton taxa to total biomass for two size fractions ( $\geq 450 \mu\text{m}$  and  $\geq 850 \mu\text{m}$ ) collected seasonally (Sp = spring, S = summer, A = autumn, W = winter) in Lake Maggiore (Northern Italy) between 2014 and 2020.

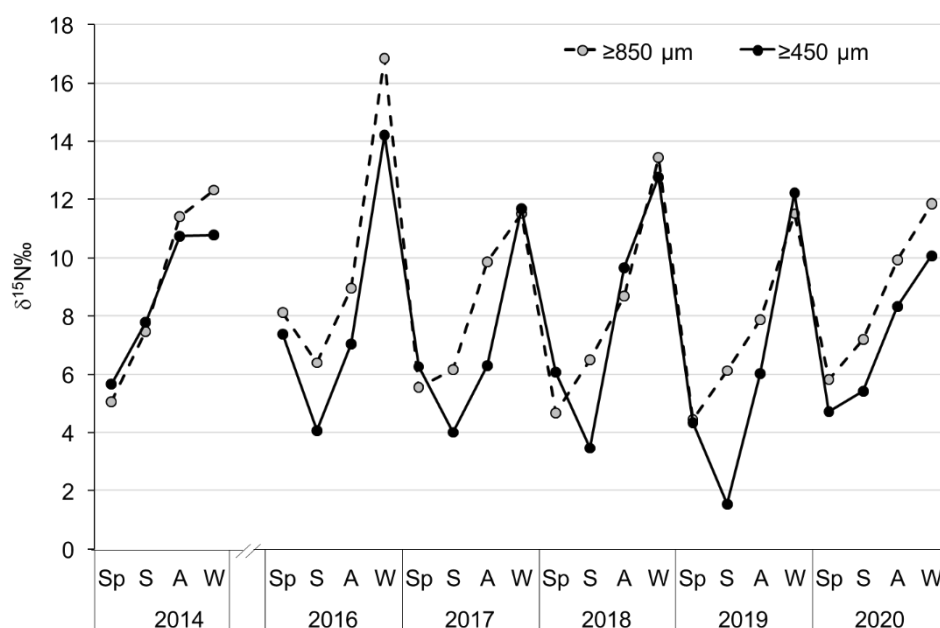

**Figure S2.** Nitrogen isotopic signatures for two size fractions ( $\geq 450 \mu\text{m}$  and  $\geq 850 \mu\text{m}$ ) of zooplankton collected seasonally (Sp = spring, S = summer, A = autumn, W = winter) in Lake Maggiore (Northern Italy) between 2014 and 2020.

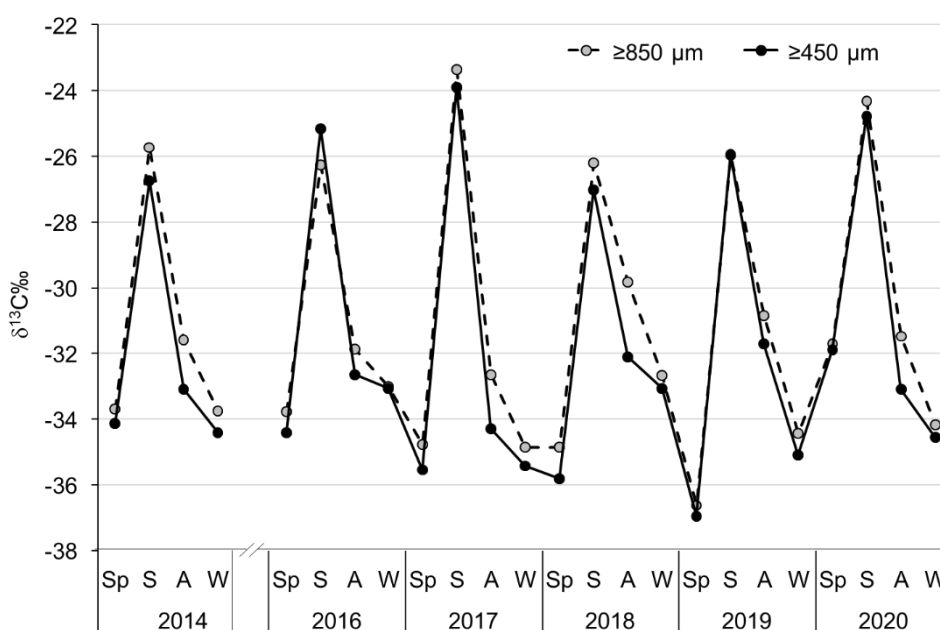

**Figure S3.** Carbon isotopic signatures for two size fractions ( $\geq 450 \mu\text{m}$  and  $\geq 850 \mu\text{m}$ ) of zooplankton collected seasonally (Sp = spring, S = summer, A = autumn, W = winter) in Lake Maggiore (Northern Italy) between 2014 and 2020.
